# Supplementary material for: Multi-responsive luminescent coordination polymer nanosheets for selective detection of nitroaromatics
Source: Royal Society of Chemistry journal article supplement (doi:10.1039/d2cc01153k), 2022-01-01
Supplement: d2cc01153k1.pdf [file d2cc01153k1.pdf]

Supporting Information

**Multi-Responsive Luminescent Coordination Polymer Nanosheets  
for Selective Detection of Nitroaromatics**

Ting Pan, Peng Wu, Weina Zhang, Yu Shen\* and Fengwei Huo\*

Key Laboratory of Flexible Electronics (KLOFE), Institute of Advanced Materials

(IAM), Nanjing Tech University, 30 South Puzhu Road, Nanjing 211816, China

E-mail: iamfwhuo@njtech.edu.cn, iamyshen@njtech.edu.cn

## General Information

Tricarboxytriphenylamine (TCA) was synthesized according to the reported reference.<sup>1</sup> All chemicals and solvents were purchased from commercial sources and used without further purification. Lanthanum nitrate hydrate ( $\text{La}(\text{NO}_3)_3 \cdot x\text{H}_2\text{O}$ ) was purchased from Alfa. N,N-dimethylformamide (DMF) was provided by Tedia. N,N-dimethylacetamide (DMA), dichloromethane (DCM), methanol (MeOH), 2,4,6-trinitrophenol (TNP), 2,4-dinitrophenol (2,4-DNP), p-nitrophenol (PNP), 2,4-dinitrotoluene (2,4-DNT), m-dinitrobenzen (m-DNB), nitrobenzene (NB) and 4-nitrotoluene (4-NT) were supplied by Sinopharm.

## Characterization

The FTIR spectra were recorded from KBr pellets in the range  $4000\text{-}400\text{ cm}^{-1}$  on Nicolet 5700 spectrometer. Powder X-ray diffraction (PXRD) data were collected from  $3^\circ$  to  $50^\circ$  with a step of  $0.02^\circ$  on XRD diffractometer (D8 Discover, Bruker-AXS) and Rigaku Smartlab with Cu-K $\alpha$  radiation ( $\lambda = 1.54056\text{ \AA}$ ). The morphologies were collected through scanning electron microscopy (SEM, JSM-7800F). Transmission electron microscopy (TEM) images were taken by JEOL 2100Plus at 200 kV. Atomic force microscopy (AFM) images were taken using a Park XE-70. Thermogravimetric analyses (TGA) were carried out on a TA Instruments SDT-Q600 simultaneous DTA-TGA under  $\text{N}_2$  at a heating rate of  $10\text{ }^\circ\text{C}/\text{min}$ . The photo-luminescence spectra were recorded on a HORIBA Fluoromax-4 fluorescence spectrometer. Dynamic light scattering (DLS) was measured on a 90 Plus particle size analyzer (Brookhaven Instruments, USA). The lifetime was measured using Edinburgh FLSP920 fluorescence spectrophotometer equipped with a nanosecond hydrogen flash-lamp (nF920) and a microsecond flash-lamp ( $\mu\text{F900}$ ).

## Synthesis of La-TCA Crystals

The mixture of  $\text{La}(\text{NO}_3)_3 \cdot x\text{H}_2\text{O}$  (406 mg, 1.25 mmol) and TCA (94 mg, 0.25 mmol) in 10 mL DMA, 4 mL water and 5 mL hydrochloric acid solution (pH = 1) were sealed in a 40 mL vial, heated to  $100\text{ }^\circ\text{C}$  and keep 24 h. After the mixture cooled to room temperature, the resultant light yellow crystals obtained were

washed with DMA and dried at room temperature (yield: 70% based on TCA ligands). The La-TCA bulk crystals were activated in a vacuum oven at 120 °C for 12 h to remove the DMA solvents and sealed for further use.

### **Synthesis of La-TCA Nanosheets**

In a typical experiment, the activated La-TCA bulk crystals (5 mg) were ground for 5 min and then immersed into methanol solution with another 1 h sonication. Then the colloidal suspension obtained was then centrifuged for three times (1000 rpm for 5 min) to remove the large particles, and subsequently the upper liquid was collected by centrifugation (10000 rpm for 5 min).

### **X-ray Crystallography of La-TCA**

The crystallographic data collections for La-TCA were carried out on a Bruker Smart Apex II CCD area detector diffractometer with graphite-monochromated Mo K $\alpha$  radiation ( $\lambda = 0.71073 \text{ \AA}$ ) at 296(2) K using the  $\omega$ -scan technique. The diffraction data were integrated using the SAINT program, which was also used for the intensity corrections for the Lorentz and polarization effects. A semi-empirical absorption correction was applied using the SADABS program. The structure of La-TCA was solved by direct method and all the non-hydrogen atoms were refined anisotropically on  $F^2$  by the full-matrix least-squares technique using the SHELXL-2014 crystallographic software package. All the hydrogen atoms were generated geometrically and refined isotropically using the riding model. In the asymmetric unit of La-TCA, two coordinated DMA solvents were disordered and refined with the ‘part’ order. The details of the crystal parameters, data collection and refinements for La-TCA bulk crystals are summarized in Table S1.

### **Fluorescence Sensing Experiment**

La-TCA nanosheets (10 mg) were immersed in different organic solvents (25 mL) followed by ultrasonication treatment for 5 min, and sampling 3 mL (~0.5 mM) stable emulsions for measurements. Then, different NACs in DMF solution were added into the La-TCA emulsion for the luminescence detection (TNP, 2,4-

DNP, and PNP with  $2 \times 10^{-3}$  mol/L; 2,4-DNT, 4-NT and m-DNB with  $2 \times 10^{-2}$  mol/L; NB with  $2 \times 10^{-1}$  mol/L) at room temperature. After sensing experiment, the La-TCA nanosheets were collected from the solutions by high-speed centrifugation (10000 rpm for 5 min). The recycled nanosheets were washed with methanol solution, and then collected by centrifuge at 10000 rpm for 5 min.

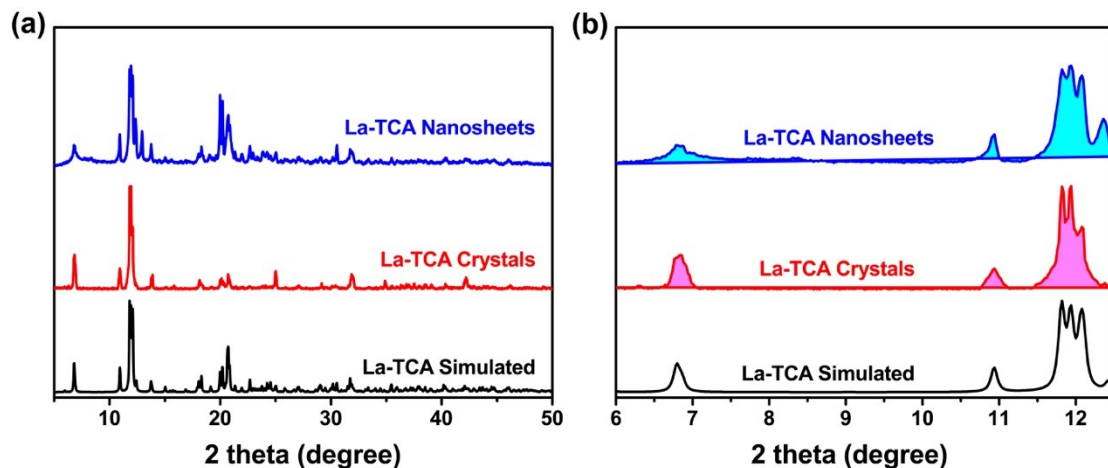

**Fig. S1** (a) PXR D patterns of the simulated, La-TCA bulk crystals and La-TCA nanosheets. (b) Magnified PXR D patterns of the simulated, La-TCA bulk crystals and La-TCA nanosheets between  $6^\circ$  and  $12.5^\circ$ .

By magnifying the PXR D patterns of La-TCA between  $6^\circ$  and  $12.5^\circ$  (Fig. S1b), it can be found more clearly that La-TCA crystals show obvious diffraction peaks at  $6.8^\circ$  (full-width at half-maximum, FWHM = 0.190),  $10.9^\circ$  (FWHM = 0.158) and  $12^\circ$  (triple peaks, FWHM = 0.269). For La-TCA nanosheets, although the diffraction peaks appear at the same position on PXR D patterns, the corresponding FWHM changes to 0.344, 0.133 and 0.393 respectively, which indicates that the diffraction peaks are obviously broadened compared with La-TCA crystals.

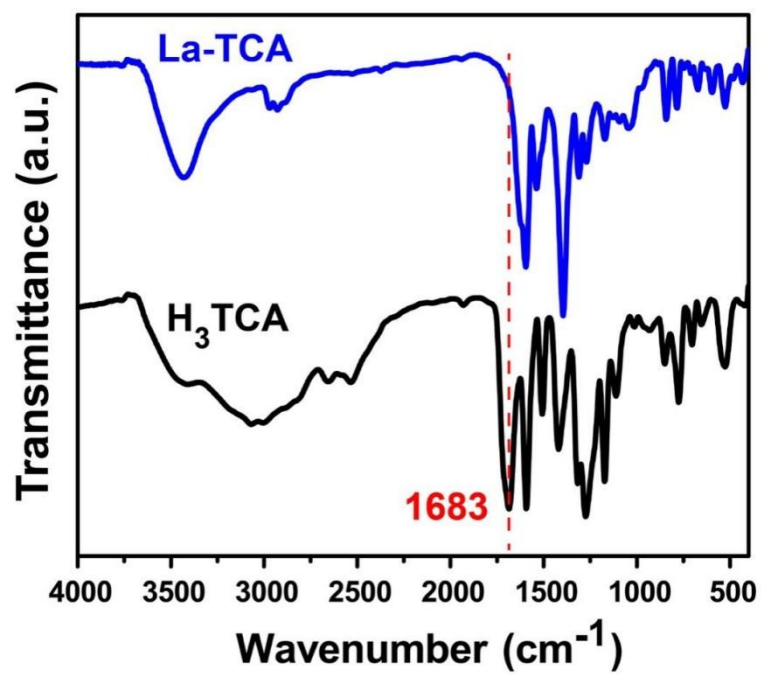

**Fig. S2** FTIR spectra of TCA ligand and bulk La-TCA.

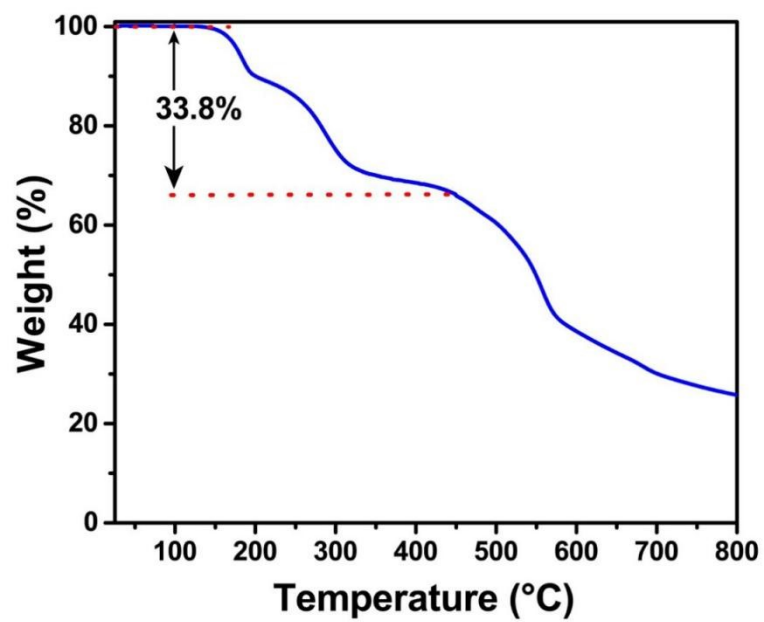

**Fig. S3** TGA curve of bulk La-TCA from 30 °C to 800 °C.

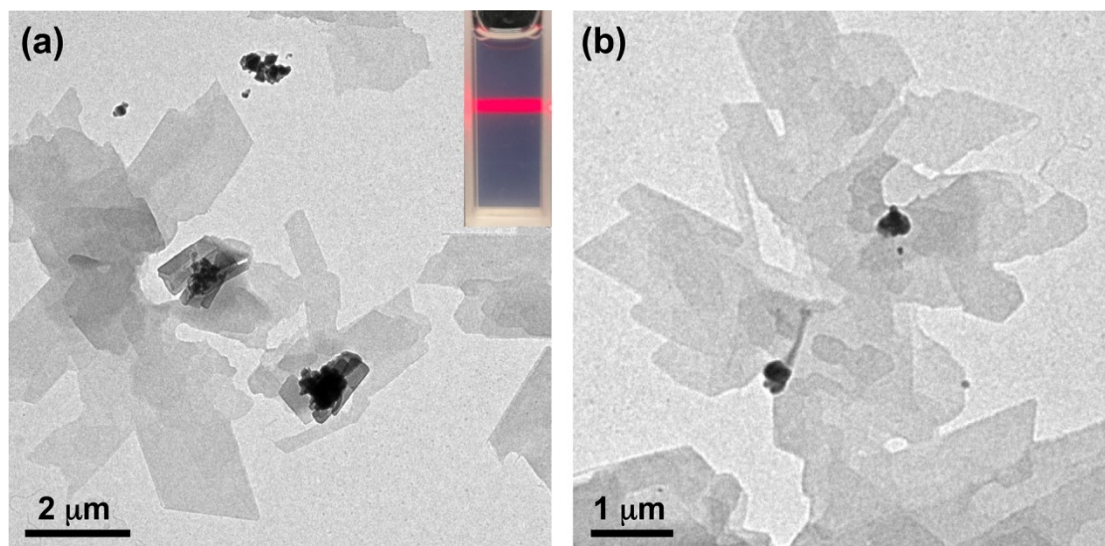

**Fig. S4** (a) and (b) Low-magnification TEM images of La-TCA nanosheets. Inset in (a): Photograph of the Tyndall effect of La-TCA nanosheets in MeOH solution.



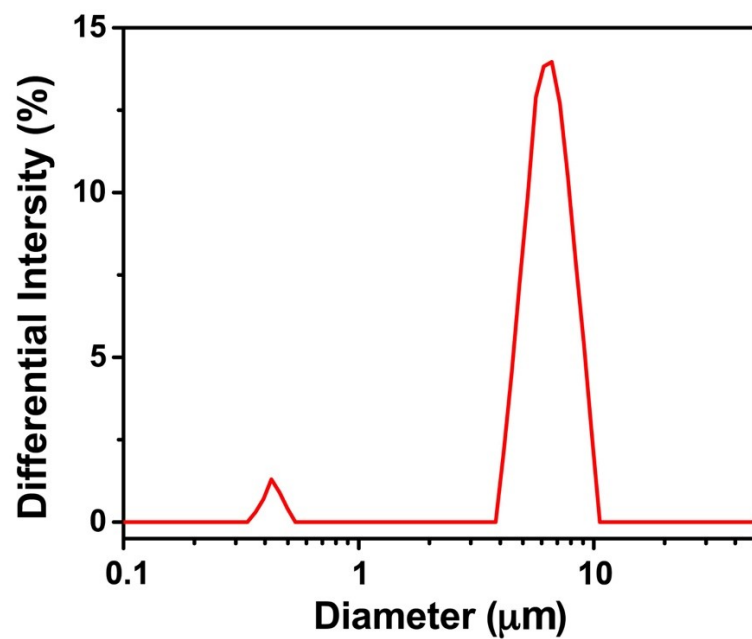

**Fig. S5** The dynamic light scattering (DLS) experimental data on the colloidal solution of La-TCA nanosheets.

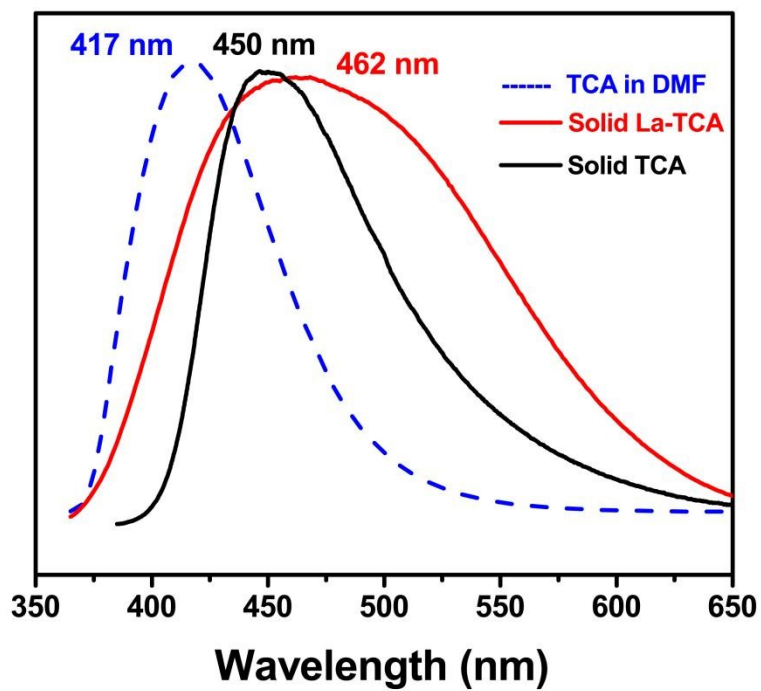

**Fig. S6** Emission spectra of TCA ligand and La-TCA in solid state as well as TCA dispersed in DMF solvent ( $\lambda_{\text{ex}}$  375 nm).

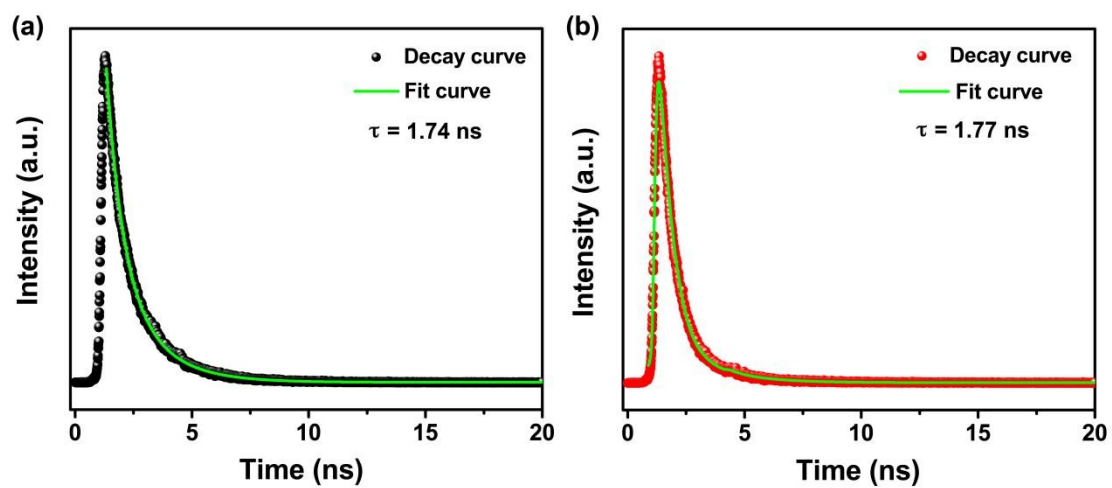

**Fig. S7** Photoluminescence decay curves of (a) TCA ligands and (b) La-TCA nanosheets.

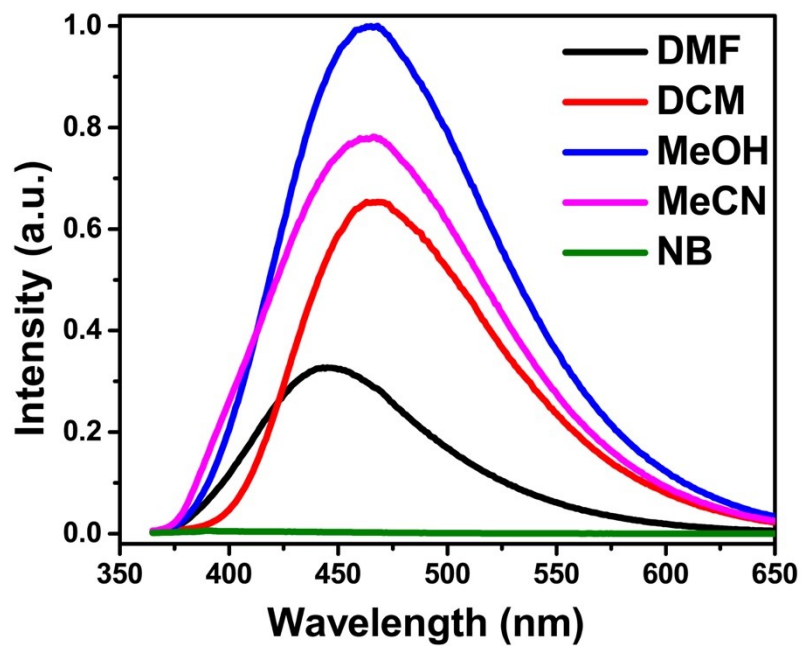

**Fig. S8** Emission spectra of La-TCA in different solvents ( $\lambda_{\text{ex}}$  375 nm).

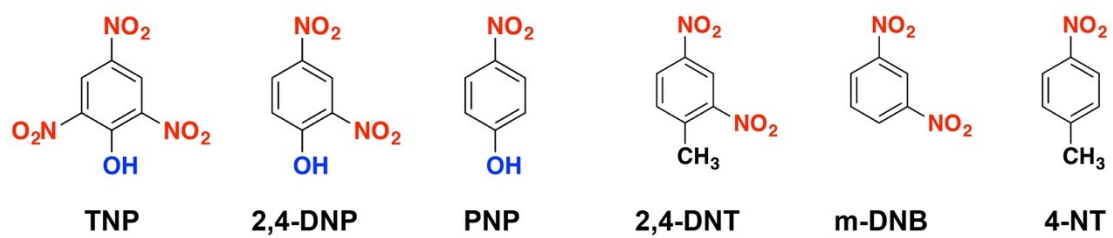

**Fig. S9** Molecular structure information of various NACs.

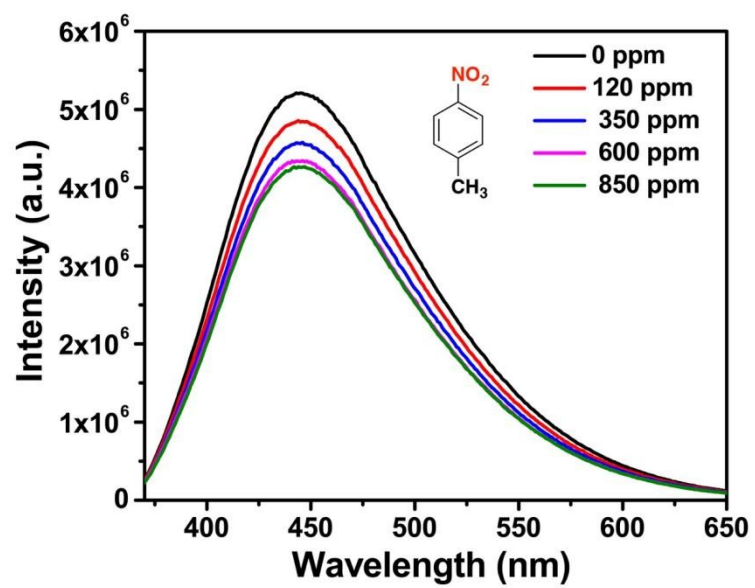

**Fig. S10** Fluorescent spectra of La-TCA nanosheets suspended in DMF solvent with different concentrations of 4-NT.

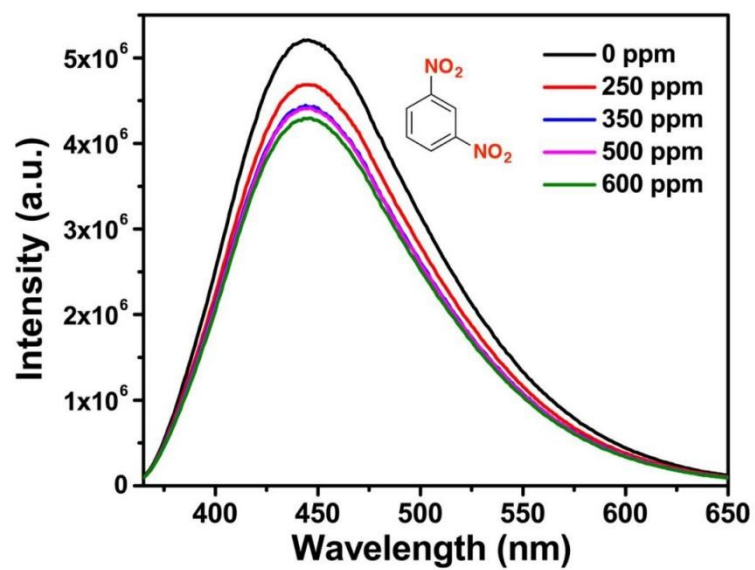

**Fig. S11** Fluorescent spectra of La-TCA nanosheets suspended in DMF solvent with different concentrations of m-DNB.

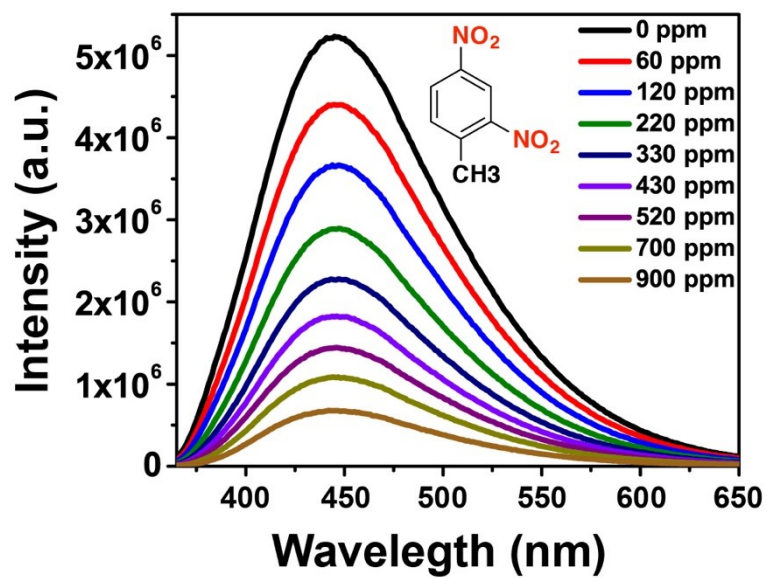

**Fig. S12** Fluorescent spectra of La-TCA nanosheets suspended in DMF solvent with different concentrations of 2,4-DNT.



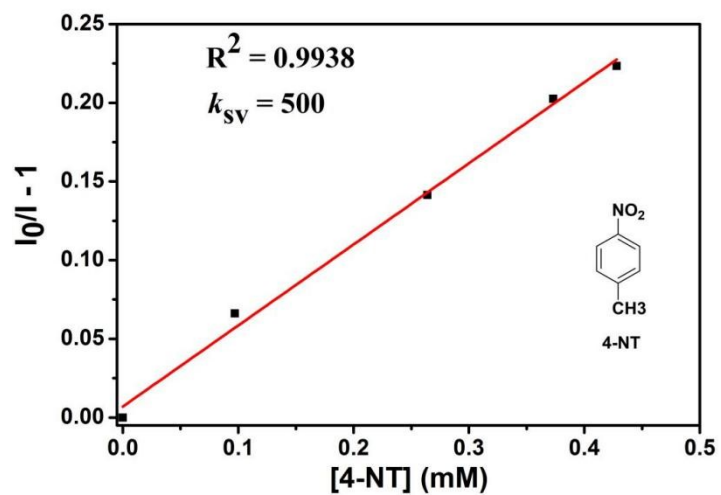

**Fig. S13** SV plot of La-TCA nanosheets for 4-NT.

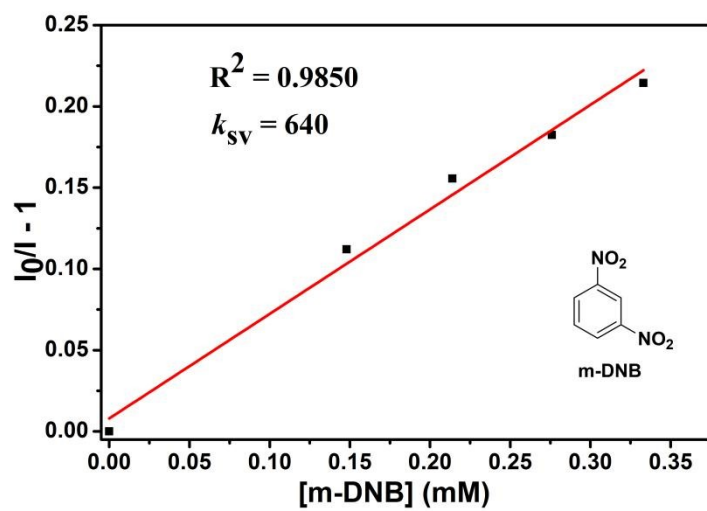

Fig. S14 SV plot of La-TCA nanosheets for m-DNB.

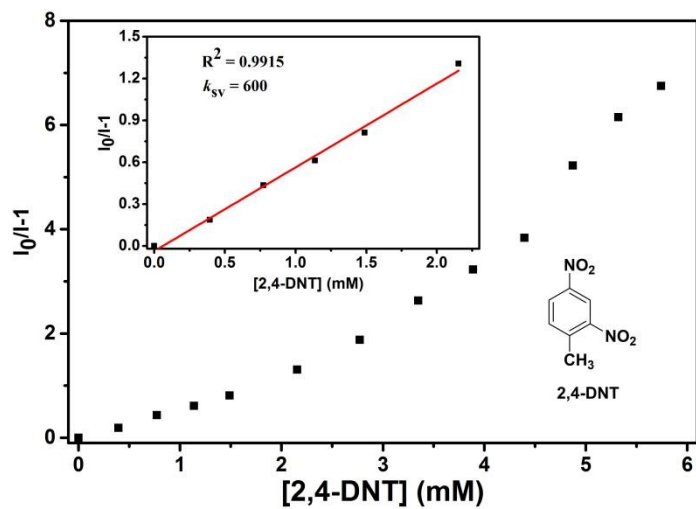

**Fig. S15** SV plot of La-TCA nanosheets for 2,4-DNT.

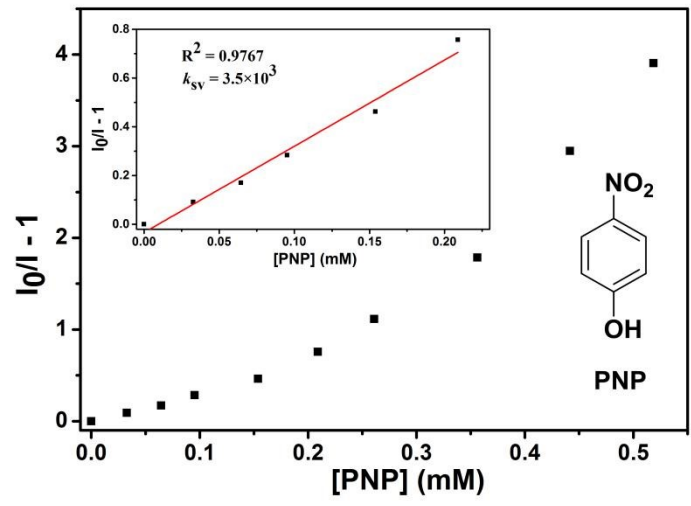

**Fig. S16** SV plot of La-TCA nanosheets for PNP. Inset: in the low concentration region.

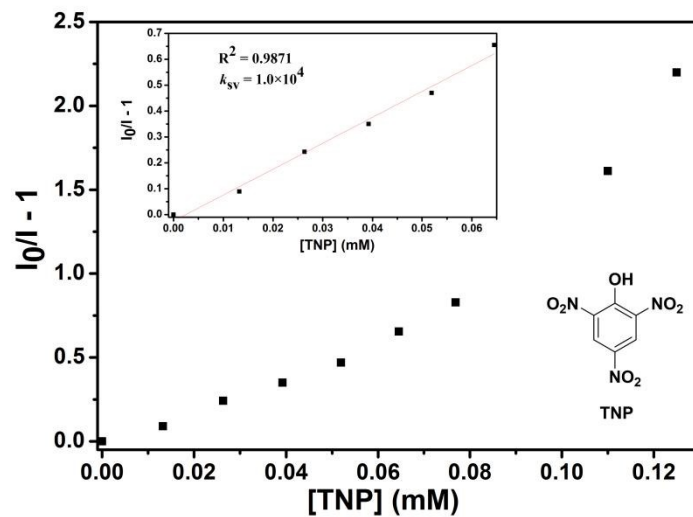

**Fig. S17** SV plot of La-TCA nanosheets for TNP. Inset: in the low concentration region.

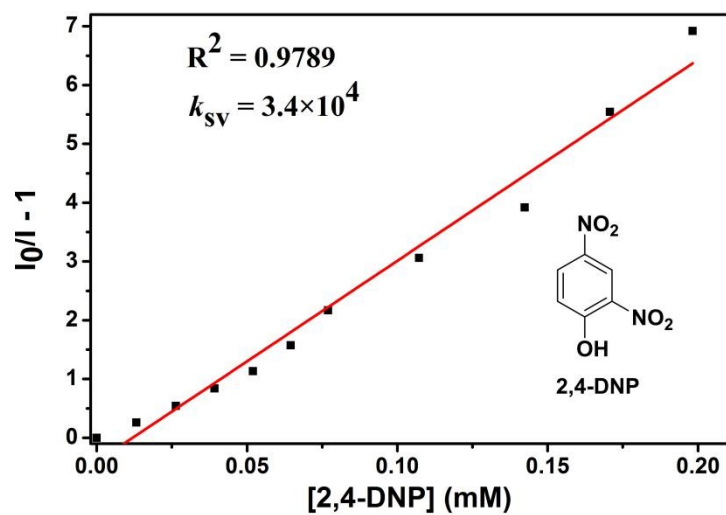

**Fig. S18** SV plot of La-TCA nanosheets for 2,4-DNP.

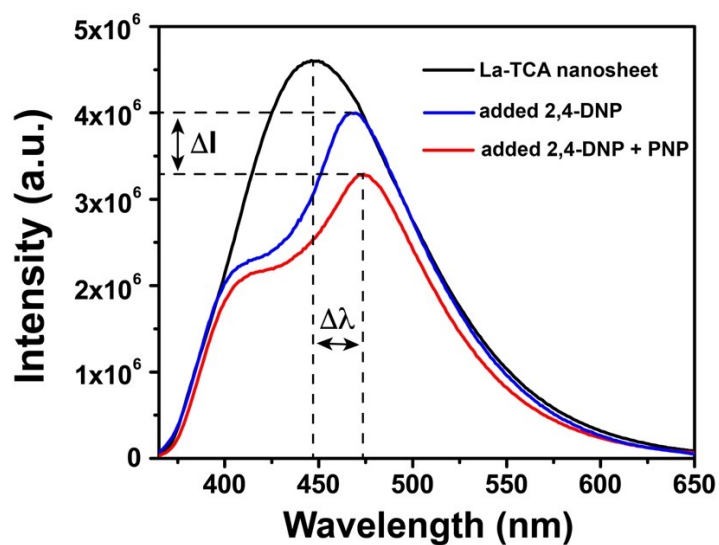

**Fig. S19** Emission spectra of La-TCA nanosheets after adding 10 ppm 2,4-DNP and 10 ppm PNP.

La-TCA nanosheets can be used to distinguish 2,4-DNP and PNP from the hybrid mixture. 2,4-DNP can be identified by the wavelength shift ( $\Delta\lambda = 25$  nm), and then PNP can be distinguished according to the changes of additional intensity ( $\Delta I$  about 15%).

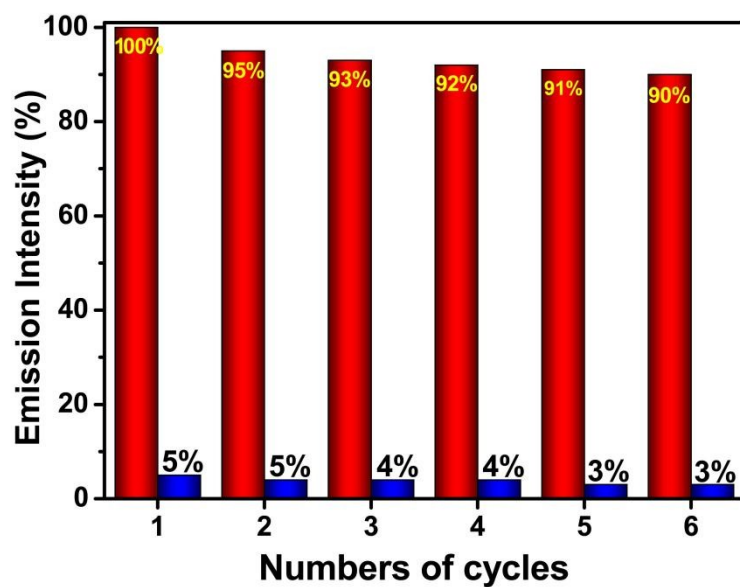

**Fig. S20** The quenching and recyclability test of La-TCA nanosheets. The red bars represent the initial luminescence intensity and the blue bars represent the intensity upon addition of 2,4-DNP.



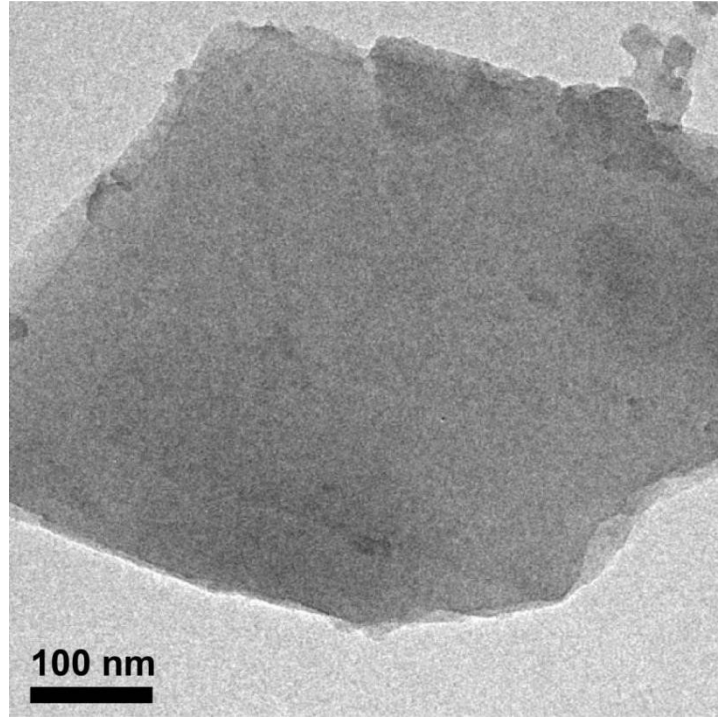

**Fig. S21** TEM image of La-TCA nanosheets after recyclability test.

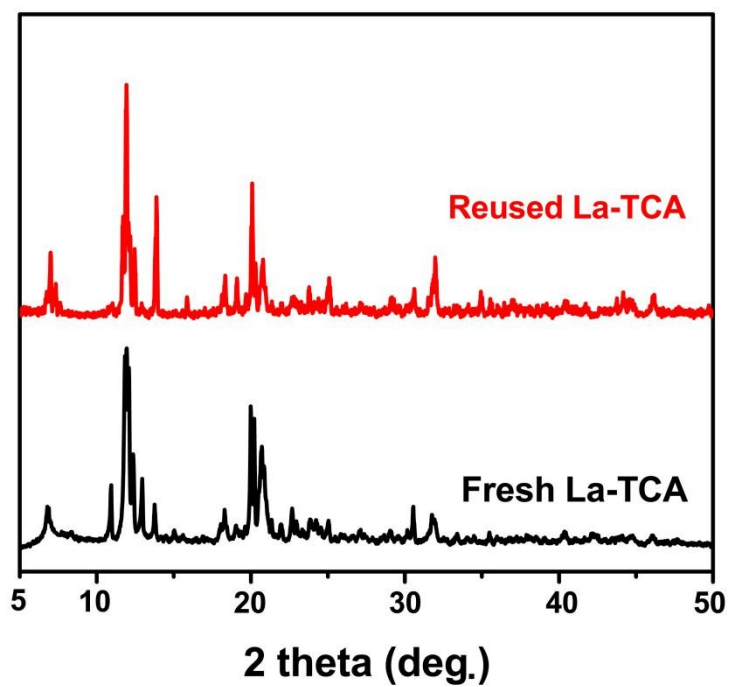

**Fig. S22** PXRD patterns of La-TCA nanosheets after recyclability test.

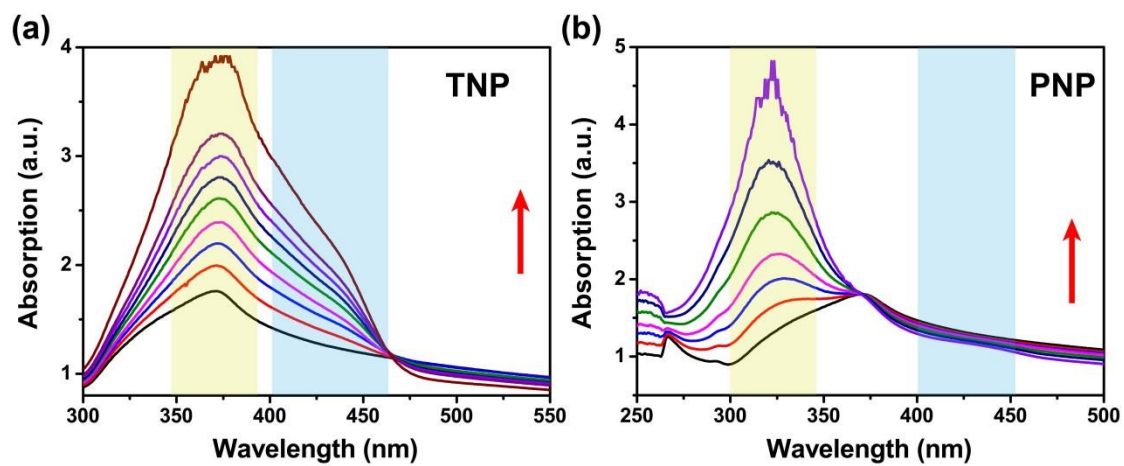

**Fig. S23** In-situ UV-vis spectroscopy of La-TCA for (a) TNP and (b) PNP during the titration process.

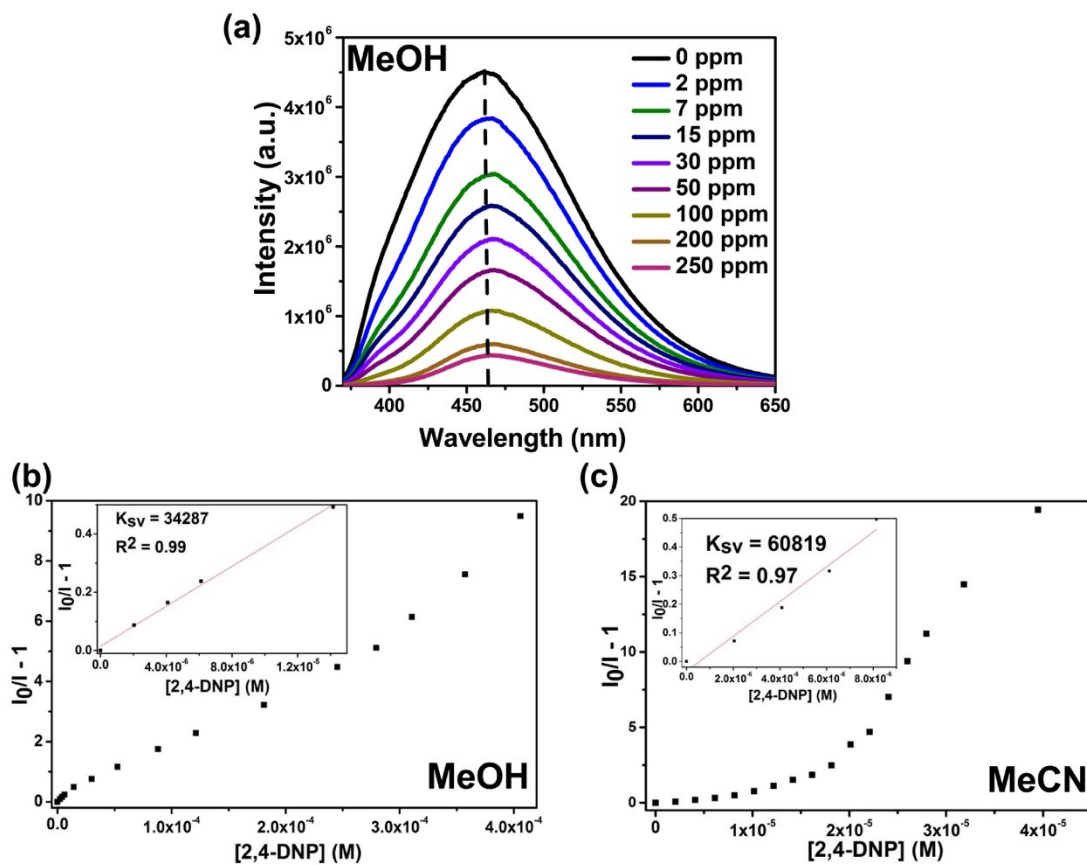

**Fig. S24** (a) Fluorescence intensity of the La-TCA nanosheets in MeOH solution upon addition of 2,4-DNP. SV plots of La-TCA nanosheets for 2,4-DNP in (b) MeOH and (c) MeCN solution.

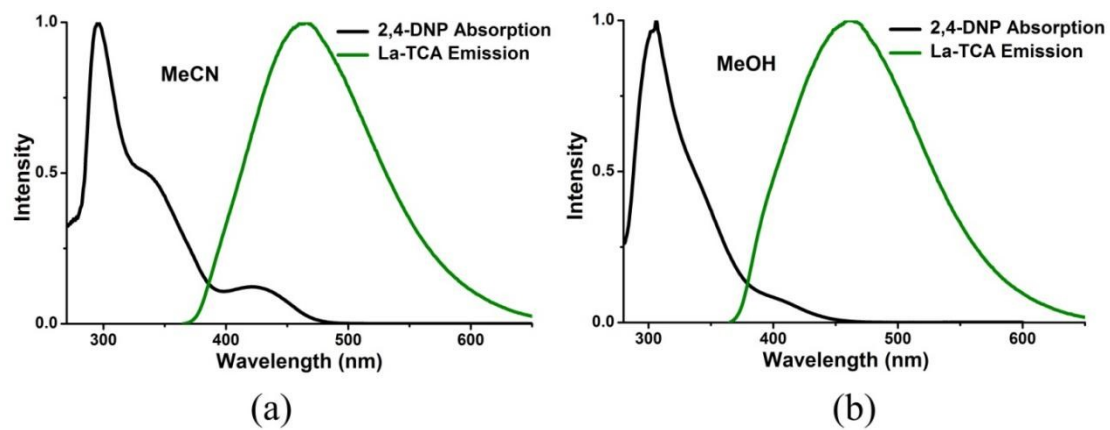

**Fig. S25** Spectral overlap between 2,4-DNP absorption spectrum and La-TCA nanosheets emission spectrum in (a) MeCN and (b) MeOH.

**Table S1.** Crystal data and structure refinements of La-TCA.

| <b>Compound</b>                                    | <b>La-TCA</b>                                                   |
|----------------------------------------------------|-----------------------------------------------------------------|
| Empirical formula                                  | C <sub>33</sub> H <sub>39</sub> LaN <sub>4</sub> O <sub>9</sub> |
| Formula weight                                     | 774.59                                                          |
| Temperature/K                                      | 296(2)                                                          |
| Crystal system                                     | Orthorhombic                                                    |
| Space group                                        | <i>pbca</i>                                                     |
| <i>a</i> /Å                                        | 26.011(5)                                                       |
| <i>b</i> /Å                                        | 8.8798(16)                                                      |
| <i>c</i> /Å                                        | 29.636(5)                                                       |
| $\alpha$ /°                                        | 90                                                              |
| $\beta$ /°                                         | 90                                                              |
| $\gamma$ /°                                        | 90                                                              |
| <i>V</i> /Å <sup>3</sup>                           | 6845(2)                                                         |
| <i>Z</i>                                           | 8                                                               |
| <i>D<sub>c</sub></i> /(g cm <sup>-3</sup> )        | 1.503                                                           |
| <i>F</i> (000)                                     | 3152                                                            |
| $\theta$ range for data collection/°               | 1.58-28.27                                                      |
| Reflections collected                              | 46524                                                           |
| Unique reflections                                 | 5974                                                            |
| Goof                                               | 1.062                                                           |
| $R_1$ <sup>[a]</sup> [ <i>I</i> > 2σ( <i>I</i> )]  | 0.0461                                                          |
| $wR_2$ <sup>[b]</sup> [ <i>I</i> > 2σ( <i>I</i> )] | 0.029                                                           |

<sup>[a]</sup>  $R_1 = \frac{\sum ||F_o| - |F_c||}{\sum |F_o|}$ .

<sup>[b]</sup>  $wR_2 = \frac{|\sum w(|F_o|^2 - |F_c|^2)|}{\sum w(F_o^2)^{1/2}}$ , where  $w = 1/[\sigma_2(F_o^2) + (aP)^2 + bP]$ .  $P = (F_o^2 + 2F_c^2)/3$ .

**Table S2.** Comparison of CP/MOF sensors for detecting NACs.

| CPs/MOFs      | Analytes       | $K_{sv}$ ( $M^{-1}$ ) | LODs                        | References       |
|---------------|----------------|-----------------------|-----------------------------|------------------|
|               | <b>2,4-DNP</b> | <b>34000</b>          | <b>0.55 ppm</b>             | <b>this work</b> |
| <b>La-TCA</b> | <b>TNP</b>     | <b>10000</b>          | <b>1.9 ppm</b>              | <b>this work</b> |
|               | <b>PNP</b>     | <b>3500</b>           | <b>1.9 ppm</b>              | <b>this work</b> |
| Cd.NTB        | TNP            | 200000                | /                           | 2                |
| Sc-EBTC       | 2,4-DNP        | 28500                 | 5.71 ppb                    | 3                |
|               | PNP            | 27500                 | 6.26 ppb                    |                  |
| Zn-MTAIA      | PNP            | 10300                 | /                           | 4                |
| Zr-NDI        | TNP            | 40570                 | 8.1 ppm                     | 5                |
| BUT-12        | TNP            | 21000                 | 23 ppb                      | 6                |
| Cd-MOF        | 2,4-DNP        | 23700                 | 0.84 ppm                    | 7                |
|               | TNP            | 16100                 | 1.57 ppm                    |                  |
| Eu-MOF        | 2,4-DNP        | 6160                  | 16.4 $\mu\text{mol L}^{-1}$ | 8                |
| Tb-MOF        | 2,4-DNP        | 7750                  | 16.2 $\mu\text{mol L}^{-1}$ |                  |
|               | PNP            | 820                   | /                           |                  |
| FCS-2         | 2,4-DNP        | 14300                 | /                           | 9                |
|               | TNP            | 38200                 | /                           |                  |

## References

1. P. Wu, Y. Li, J.-J. Zheng, N. Hosono, K. Otake, J. Wang, Y. Liu, L. Xia, M. Jiang, S. Sakaki, S. Kitagawa. Carbon dioxide capture and efficient fixation in a dynamic porous coordination polymer. *Nat. Commun.*, **2019**, *10*, 4362.
2. Z.-Q. Shi, N.-N. Ji, H.-L. Hu. Luminescent triphenylamine-based metal–organic frameworks: recent advances in nitroaromatics detection. *Dalton Trans.*, **2020**, *49*, 12929–12939.
3. D. Zhan, A. Saeed, Z. Li, C. Wang, Z. Yu, J. Wang, N. Zhao, W. Xu, J. Liu. Highly fluorescent scandium-tetracarboxylate frameworks: selective detection of nitroaromatic compounds, sensing mechanism, and their application. *Dalton Trans.*, **2020**, *49*, 17737–17744.
4. P. Dasa, S. K. Mandal. A highly emissive fluorescent Zn-MOF: molecular decoding strategies for solvents and trace detection of dunnite in water. *J. Mater. Chem. A*, **2018**, *6*, 21274–21279.
5. G. Radha, T. Leelasree, D. Muthukumar, Renjith S. Pillai, H. Aggarwal. Highly selective detection of TNP over other nitro compounds in water: the role of selective host–guest interactions in Zr-NDI MOF. *New J. Chem.*, **2021**, *45*, 12931–12937.
6. B. Wang, X.-L. Lv, D. Feng, L.-H. Xie, J. Zhang, M. Li, Y. Xie, J.-R. Li, H.-C. Zhou. Highly stable zr(iv)-based metal–organic frameworks for the detection and removal of antibiotics and organic explosives in water. *J. Am. Chem. Soc.*, **2016**, *138*, 6204–6216.
7. L. Lu, J. Wu, J. Wang, J.-Q. Liu, B.-H. Li, A. Singh, A. Kumar, S. R. Batten. An uncommon 3D 3,3,4,8-c Cd(II) metal–organic framework for highly efficient luminescent sensing and organic dye adsorption: experimental and theoretical insight. *CrystEngComm*, **2017**, *19*, 7057–7067.
8. Z. Sun, Y. Li, Y. Ma, L. Li. Dual-functional recyclable luminescent sensors based on 2D lanthanide-based metal-organic frameworks for highly sensitive detection of Fe<sup>3+</sup> and 2,4-dinitrophenol. *Dyes Pigm.*, **2017**, *146*, 263–271.
9. M.-M. Chen, X. Zhou, H.-X. L, X.-X. Yang, J.-P. Lang. Luminescent two-dimensional coordination polymer for selective and recyclable sensing of nitroaromatic compounds with high sensitivity in water. *Cryst. Growth Des.*, **2015**, *15*, 2753–2760.
